# Supplementary material
Source: MDPI journal article supplement (https://www.mdpi.com/2076-3417/5/3/209)
Supplement: s1 [file s1]

## Supplementary Information

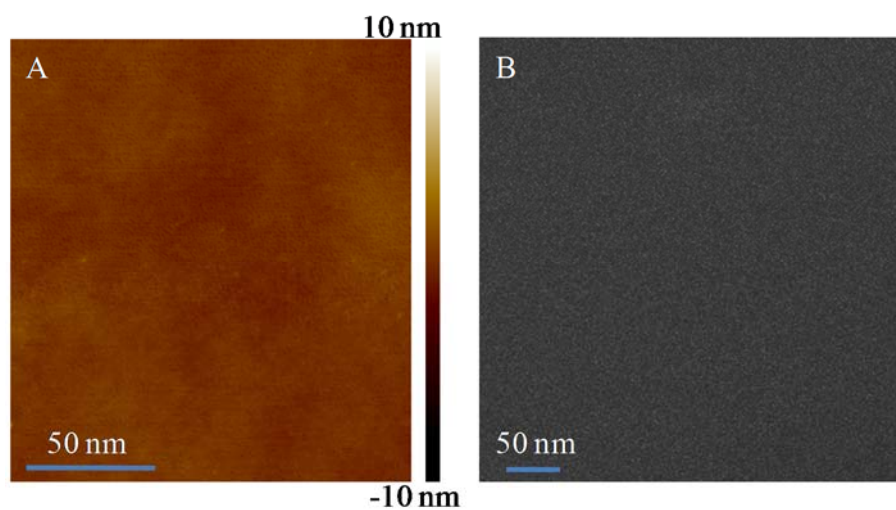

**Figure S1.** The images of nanoplate film after 15 minutes deposited on untreated silicon surface (**A**) AFM image (**B**) FESEM image.
